# Supplementary material for: Universal artificial intelligence platform for collaborative management of cataracts
Source: PubMed Central journal article supplement — Br J Ophthalmol. 2019 Sep 2;103(11):1553–60. doi: 10.1136/bjophthalmol-2019-314729 (PMC6855787; doi:10.1136/bjophthalmol-2019-314729), 2019-09-02
Supplement: bjophthalmol-2019-314729supp001.pdf [file bjophthalmol-2019-314729supp001.pdf]

1 **Supplementary Figures**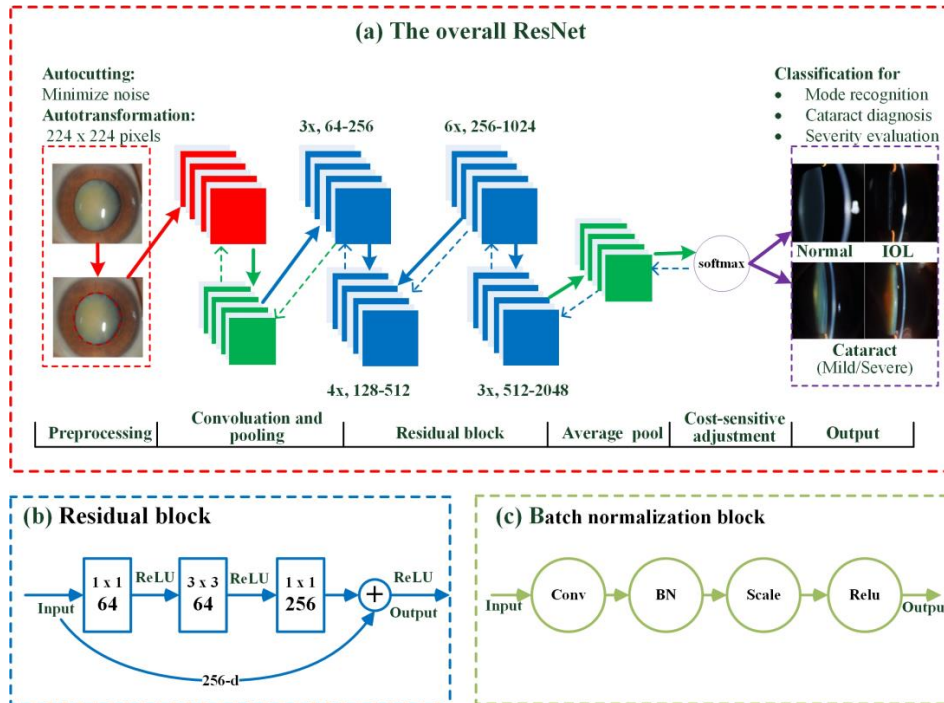

2  
3  
4  
5  
6  
7  
8  
9  
10

**Figure S1. The architecture of the ResNet method. a,** The overall architecture of the ResNet model; this model consists of convolution layers, a max-pooling operation and 16 residual blocks, which are indicated by the red, green and blue rectangles, respectively, followed by softmax and cost-sensitive adjustment layers. **b,** One unfolded residual block. **c,** The BN and scale operations. ResNet, residual network; BN, batch normalization; Conv, convolution operation; ReLU, rectified linear unit.

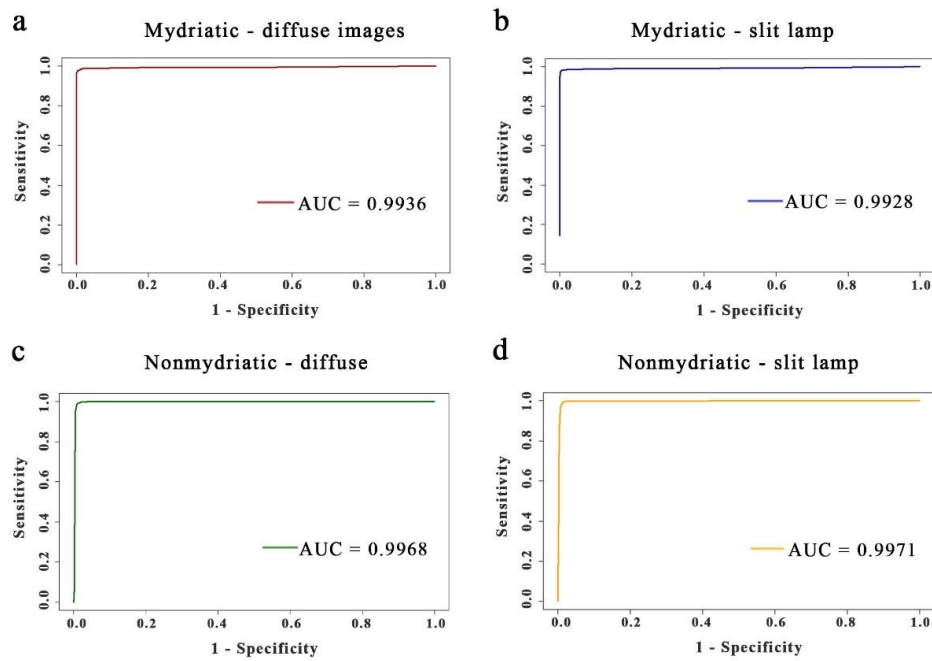

11 **Figure S2. Receiver operating characteristic (ROC) curves and areas under the**  
12 **curve (AUCs) of the deep learning system for the detection of different capture**  
13 **modes. a, Mydriatic-diffuse images; b, mydriatic-slit lamp images; c, nonmydriatic-**  
14 **diffuse images; d, nonmydriatic slit lamp images.**  
15

16

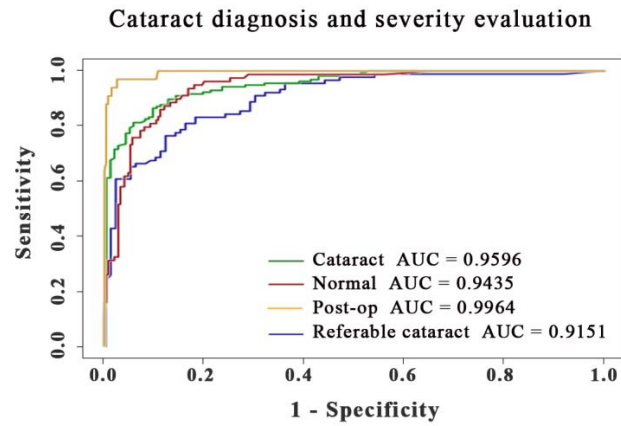

17 **Figure S3. Receiver operating characteristic (ROC) curves and areas under the**  
18 **curve (AUCs) of diagnostic performance in the cataract AI ambulatory site in a**  
19 **real-world tertiary referral pattern. a, Mydriatic-diffuse images; b, mydriatic-slit**  
20 **lamp images; c, nonmydriatic-diffuse images; d, nonmydriatic slit lamp images.**

21

22

23 **Supplementary Tables**24 **Table S1. Demographics and summary of the Chinese Medical Alliance for**  
25 **Artificial Intelligence (CMAAI) datasets.**

| <b>Demographics</b>                   | <b>Training set<br/>number (%)</b> | <b>Validation set<br/>number (%)</b> |
|---------------------------------------|------------------------------------|--------------------------------------|
| <b>Total number of images</b>         | 30132                              | 7506                                 |
| <b>Total number of eyes</b>           | 23935                              | 5036                                 |
| <b>Total number of patients</b>       | 13036                              | 3575                                 |
| <b>Age, adults (&gt;18 years old)</b> | 27930 (92.7)                       | 7475 (99.6)                          |
| <b>Gender, Male</b>                   | 15110 (54.1)                       | 4201 (56.2)                          |
| <b>Datasets</b>                       |                                    |                                      |
| ZOCES 2013-2016                       | 29002                              | 1130                                 |
| ZOCES 2016-2017                       | 0                                  | 5999                                 |
| HZSP                                  | 101                                | 34                                   |
| EGES                                  | 574                                | 191                                  |
| GHMEP                                 | 284                                | 95                                   |
| SCGSP                                 | 171                                | 57                                   |
| <b>Capture modes</b>                  |                                    |                                      |
| Mydriatic & diffuse                   | 7990 (26.5)                        | 1991 (26.5)                          |
| Mydriatic & slit lamp                 | 7990 (26.5)                        | 1991 (26.5)                          |
| Nonmydriatic & diffuse                | 6162 (20.4)                        | 1533 (20.4)                          |
| Nonmydriatic & slit lamp              | 7990 (26.5)                        | 1991 (26.5)                          |
| <b>Diagnosis</b>                      |                                    |                                      |
| Normal                                | 3618 (12.0)                        | 890 (11.9)                           |
| Mild cataract                         | 7817 (25.9)                        | 2606 (34.7)                          |
| Severe cataract                       | 7233 (24.0)                        | 2384 (31.8)                          |
| Postoperative eye                     | 5363 (17.8)                        | 1620 (21.6)                          |

26 **Footnotes:** ZOCES: Zhongshan Ophthalmic Center Eye Study; HZSP: Huazhong  
27 Screening Program; EGES: Eastern Guangdong Eye Study; GHMEP: Guangdong-  
28 Hong Kong-Marco Greater Bay Area Eye Project; SCGSP: Southern China Guangming  
29 Screening Program.

30

31

32

33

34 **Table S2. Compositions of the training and validation datasets considering the**  
 35 **diseases and capture modes.**

| <b>Images</b><br><b>(training/validation)</b> | <b>Mydriatic</b><br><b>&amp;</b><br><b>diffuse</b> | <b>Mydriatic</b><br><b>&amp;</b><br><b>slit lamp</b> | <b>Nonmydriatic</b><br><b>&amp;</b><br><b>diffuse</b> | <b>Nonmydriatic</b><br><b>&amp;</b><br><b>slit lamp</b> |
|-----------------------------------------------|----------------------------------------------------|------------------------------------------------------|-------------------------------------------------------|---------------------------------------------------------|
| <b>Total</b>                                  | 7990/1991                                          | 7990/1991                                            | 6162/1533                                             | 7990/1991                                               |
| <b>Normal</b>                                 | 661/200                                            | 352/60                                               | 771/200                                               | 1518/430                                                |
| <b>Cataract</b>                               | 1830/451                                           | 1830/451                                             | 1830/451                                              | 1830/451                                                |
| <b>Pediatric cataract</b>                     |                                                    |                                                      |                                                       |                                                         |
| <b>No VAO</b>                                 | 1060/11                                            | /                                                    | /                                                     | /                                                       |
| <b>VAO</b>                                    | 1142/20                                            | /                                                    | /                                                     | /                                                       |
| <b>Adult cataract</b>                         |                                                    |                                                      |                                                       |                                                         |
| <b>Cataract</b><br><b>diagnosis</b>           |                                                    |                                                      |                                                       |                                                         |
| <b>Mild (Nuclear I-II)</b>                    | 2456/600                                           | 2000/1000                                            | 1124/350                                              | 1540/300                                                |
| <b>No PCO/ACO</b>                             | /                                                  | 3389/113                                             | /                                                     | /                                                       |
| <b>PCO/ACO</b>                                | /                                                  | 2555/20                                              | /                                                     | /                                                       |
| <b>Severe (Nuclear III-V)</b>                 | 2127/520                                           | 2000/1000                                            | 808/250                                               | 1167/250                                                |
| <b>Post-op</b>                                | 2131/500                                           | 1752/800                                             | 645/200                                               | 939/120                                                 |
| <b>PCO</b>                                    |                                                    |                                                      |                                                       |                                                         |
| <b>No VAO</b>                                 | 5479/125                                           | /                                                    | /                                                     | /                                                       |
| <b>VAO</b>                                    | 4805/50                                            | /                                                    | /                                                     | /                                                       |

36 **Footnotes:** PCO: posterior capsular opacification; ACO: anterior capsular  
 37 opacification; VAO: visual axis opacity.

38

39

40 **Table S3. Diagnostic performance of the cataract AI agent.**

|                           | Index           | Mydriatic<br>&<br>diffuse  | Mydriatic<br>&<br>slit lamp | Nonmydriatic<br>&<br>diffuse | Nonmydriatic<br>&<br>slit lamp |                            |
|---------------------------|-----------------|----------------------------|-----------------------------|------------------------------|--------------------------------|----------------------------|
| <b>Capture mode</b>       | <b>AUC</b>      | 99.36%<br>(99.12%, 99.61%) | 99.28%<br>(99.01%, 99.54%)  | 99.68%<br>(99.49%, 99.88%)   | 99.71%<br>(99.55%, 99.88%)     |                            |
|                           | <b>ACC</b>      | 97.90%<br>(97.54%, 98.21%) | 97.90%<br>(97.54%, 98.21%)  | 97.90%<br>(97.54%, 98.21%)   | 97.90%<br>(97.54%, 98.21%)     |                            |
|                           | <b>SEN</b>      | 97.74%<br>(96.99%, 98.35%) | 95.98%<br>(95.02%, 96.80%)  | 98.63%<br>(97.91%, 99.15%)   | 99.40%<br>(98.95%, 99.69%)     |                            |
|                           | <b>SPE</b>      | 99.58%<br>(99.37%, 99.74%) | 99.89%<br>(99.76%, 99.96%)  | 99.18%<br>(98.92%, 99.39%)   | 98.55%<br>(98.20%, 98.85%)     |                            |
| <b>Cataract diagnosis</b> | <b>Normal</b>   | <b>AUC</b>                 | 99.67%<br>(99.04%, 100%)    | 99.82%<br>(98.93%, 100%)     | 99.26%<br>(98.16%, 100%)       | 99.30%<br>(98.57%, 100%)   |
|                           |                 | <b>ACC</b>                 | 98.79%<br>(98.18%, 99.24%)  | 98.88%<br>(98.42%, 99.23%)   | 96.00%<br>(94.11%, 97.42%)     | 94.81%<br>(92.99%, 96.26%) |
|                           |                 | <b>SEN</b>                 | 93.00%<br>(88.53%, 96.12%)  | 93.33%<br>(83.80%, 98.15%)   | 88.00%<br>(81.70%, 92.73%)     | 95.14%<br>(92.34%, 97.15%) |
|                           |                 | <b>SPE</b>                 | 99.51%<br>(99.03%, 99.79%)  | 99.00%<br>(98.56%, 99.33%)   | 98.67%<br>(97.12%, 99.51%)     | 94.52%<br>(91.90%, 96.50%) |
|                           | <b>Cataract</b> | <b>AUC</b>                 | 99.93%<br>(99.81%, 100%)    | 99.96%<br>(99.90%, 100%)     | 99.19%<br>(98.29%, 100%)       | 99.38%<br>(98.72%, 100%)   |
|                           |                 | <b>ACC</b>                 | 98.68%<br>(98.04%, 99.15%)  | 98.92%<br>(98.46%, 99.26%)   | 94.33%<br>(92.17%, 96.04%)     | 94.55%<br>(92.70%, 96.04%) |
|                           |                 | <b>SEN</b>                 | 98.57%<br>(97.69%, 99.18%)  | 98.85%<br>(98.28%, 99.27%)   | 96.33%<br>(93.53%, 98.16%)     | 93.14%<br>(89.97%, 95.56%) |
|                           |                 | <b>SPE</b>                 | 98.86%<br>(97.76%, 99.51%)  | 99.07%<br>(98.18%, 99.60%)   | 92.33%<br>(88.72%, 95.08%)     | 95.71%<br>(93.31%, 97.44%) |
|                           | <b>Post-op</b>  | <b>AUC</b>                 | 99.93%<br>(99.74%, 100%)    | 99.93%<br>(99.78%, 100%)     | 98.99%<br>(97.66%, 100%)       | 99.74%<br>(98.69%, 100%)   |
|                           |                 | <b>ACC</b>                 | 98.46%<br>(97.78%, 98.98%)  | 99.41%<br>(99.05%, 99.65%)   | 95.33%<br>(93.33%, 96.88%)     | 99.22%<br>(98.31%, 99.71%) |
|                           |                 | <b>SEN</b>                 | 98.60%<br>(97.14%, 99.44%)  | 98.38%<br>(97.24%, 99.13%)   | 90.67%<br>(84.84%, 94.80%)     | 95.71%<br>(87.98%, 99.11%) |
|                           |                 | <b>SPE</b>                 | 98.41%<br>(97.58%, 99.01%)  | 99.81%<br>(99.50%, 99.95%)   | 96.89%<br>(94.84%, 98.29%)     | 99.57%<br>(98.75%, 99.91%) |

41 **Footnotes:** AUC: area under the receiver operating curve; accuracy (ACC) = (TP + TN) /  
42 (TP + TN + FP + FN); sensitivity (SEN) = TP / (TP + FN); specificity (SPE) = TN / (TN +  
43 FP); TP = true positive; TN = true negative; FP = false positive; FN = false negative.

44

45 **Table S4. Performance of the cataract AI agent for referable conditions regarding**  
 46 **disease severity and etiology.**

|                           |                        | AUC                           | ACC                          | SEN                          | SPE                          |                            |
|---------------------------|------------------------|-------------------------------|------------------------------|------------------------------|------------------------------|----------------------------|
| <b>Pediatric cataract</b> | <b>VAO</b>             | 100.00%<br>(100.00%, 100.00%) | 100.00%<br>(88.78%, 100.00%) | 100.00%<br>(83.16%, 100%)    | 100.00%<br>(71.51%, 100.00%) |                            |
|                           | <b>No VAO</b>          | 100.00%<br>(100.00%, 100.00%) | 100.00%<br>(88.78%, 100.00%) | 100.00%<br>(71.51%, 100.00%) | 100.00%<br>(83.16%, 100.00%) |                            |
| <b>Adult cataract</b>     | <b>MD</b>              | 98.84%<br>(98.05%, 99.63%)    | 95.63%<br>(94.26%, 96.75%)   | 94.04%<br>(91.64%, 95.91%)   | 97.00%<br>(95.30%, 98.21%)   |                            |
|                           |                        | <b>MS</b>                     | 99.15%<br>(98.68%, 99.63%)   | 95.05%<br>(94.01%, 95.96%)   | 94.80%<br>(93.24%, 96.09%)   | 95.30%<br>(93.80%, 96.53%) |
|                           | <b>Nuclear (III-V)</b> | <b>ND</b>                     | 93.28%<br>(89.02%, 97.54%)   | 89.00%<br>(84.90%, 92.31%)   | 88.67%<br>(82.48%, 93.26%)   | 89.33%<br>(83.26%, 93.78%) |
|                           |                        | <b>NS</b>                     | 98.38%<br>(96.52%, 100%)     | 94.57%<br>(91.65%, 96.70%)   | 94.00%<br>(88.92%, 97.22%)   | 95.00%<br>(91.00%, 97.58%) |
|                           | <b>MD</b>              | 98.84%<br>(98.01%, 99.66%)    | 95.63%<br>(94.26%, 96.75%)   | 97.00%<br>(95.30%, 98.21%)   | 94.04%<br>(91.64%, 95.91%)   |                            |
|                           |                        | <b>MS</b>                     | 99.15%<br>(98.67%, 99.63%)   | 95.05%<br>(94.01%, 95.96%)   | 95.30%<br>(93.80%, 96.53%)   | 94.80%<br>(93.24%, 96.09%) |
|                           | <b>Nuclear (I-II)</b>  | <b>ND</b>                     | 93.28%<br>(88.96%, 97.60%)   | 89.00%<br>(84.90%, 92.31%)   | 89.33%<br>(83.26%, 93.78%)   | 88.67%<br>(82.48%, 93.26%) |
|                           |                        | <b>NS</b>                     | 98.38%<br>(96.73%, 100%)     | 94.57%<br>(91.65%, 96.70%)   | 95.00%<br>(91.00%, 97.58%)   | 94.00%<br>(88.92%, 97.22%) |
|                           | <b>No PCO/ACO</b>      | 94.88%<br>(90.52%, 99.24%)    | 88.00%<br>(82.24%, 92.42%)   | 95.20%<br>(89.85%, 98.22%)   | 70.00%<br>(55.39%, 82.14%)   |                            |
|                           |                        | <b>PCO/ACO</b>                | 94.88%<br>(90.52%, 99.24%)   | 88.00%<br>(82.24%, 92.42%)   | 70.00%<br>(55.39%, 82.14%)   | 95.20%<br>(89.85%, 98.22%) |
| <b>Post-op PCO</b>        | <b>VAO</b>             | 91.90%<br>(83.48%, 100.00%)   | 89.47%<br>(82.97%, 94.12%)   | 70.00%<br>(45.72%, 88.11%)   | 92.92%<br>(86.53%, 96.89%)   |                            |
|                           | <b>No VAO</b>          | 91.90%<br>(83.48%, 100.00%)   | 89.47%<br>(82.97%, 94.12%)   | 92.92%<br>(86.53%, 96.89%)   | 70.00%<br>(45.72%, 88.11%)   |                            |

47 **Footnotes:** AUC: area under the receiver operating curve; accuracy (ACC) = (TP + TN)  
 48 / (TP + TN + FP + FN); sensitivity (SEN) = TP / (TP + FN); specificity (SPE) = TN /  
 49 (TN + FP); TP = true positive; TN = true negative; FP = false positive; FN = false  
 50 negative; VAO: visual axis opacity; PCO: posterior capsular opacification; ACO:  
 51 anterior capsular opacification; MD: mydriatic-diffuse; MS: mydriatic-slit lamp; ND:  
 52 nonmydriatic-diffuse; NS: nonmydriatic-slit lamp.

53
